1 **Boosting Toll-like receptor 4 signaling enhances the therapeutic outcome of antibiotic therapy in**  
2 **pneumococcal pneumonia**

3  
4  
5 Fiordilieg Casilag<sup>1</sup>, Sebastian Franck<sup>2</sup>, Laura Matarazzo<sup>1</sup>, Martin Figeac<sup>3</sup>, Robin Michelet<sup>2</sup>, Charlotte Kloft<sup>2</sup>,  
6 Christophe Carnoy<sup>1</sup>, and Jean-Claude Sirard<sup>1\*</sup>

7  
8  
9 <sup>1</sup> Univ. Lille, CNRS, INSERM, CHU Lille, Institut Pasteur de Lille, U1019 – UMR9017 - CIIL - Center for  
10 Infection and Immunity of Lille, F-59000 Lille, France

11 <sup>2</sup> Freie Universitaet Berlin, Institute of Pharmacy, Dept. of Clinical Pharmacy & Biochemistry, D-12169 Berlin,  
12 Germany

13 <sup>3</sup> Univ. Lille, Plateforme de Génomique Fonctionnelle et Structurale, F-59000 Lille, France

14

15

16 \* Correspondence: [jean-claude.sirard@inserm.fr](mailto:jean-claude.sirard@inserm.fr)

17

18 Running title: TLR4-mediated boosting of antibiotic in pneumonia

19

20 **ABSTRACT**

21 The emergence and spread of antibiotic resistance emphasize the need for alternative treatment strategies  
22 against bacterial infections. Boosting the host innate immunity is not only readily deployable in most individuals  
23 but can also mobilize many different antibacterial defenses. This study tested the hypothesis whereby  
24 stimulation of the innate immune receptor Toll-like receptor 4 (TLR4) can be combined with antibiotics in the  
25 treatment of invasive pneumonia. In a mouse model of *Streptococcus pneumoniae* infection, a single oral  
26 administration of low-dose amoxicillin (AMX) or the systemic delivery of monophosphoryl lipid A (MPLA, a  
27 clinically-approved TLR4 activator) decreased the bacterial load in lung and spleen, although this was not  
28 sufficient for long-term survival. In contrast, a single treatment with a combination of MPLA and AMX induced  
29 significant bacterial clearance with little to no regrowth over time, and was associated with longer survival.  
30 Upregulation of genes related to granulocyte infiltration in lung tissue and elevation of blood levels of pro-  
31 inflammatory cytokines was immediate and transient in MPLA-treated mice; this indicates activation of the  
32 innate immune system in a context of infection. Combination treatment was associated with a well-preserved  
33 lung tissue architecture and more rapid recovery from inflammation - suggesting that immune activation by  
34 MPLA does not exacerbate pneumonia-induced damage. After AMX administration, plasma AMX  
35 concentrations rapidly reached the maximum and declined, whereas the downstream effects of MPLA extended  
36 beyond AMX elimination; these findings suggested a two-step effect. Our results demonstrated that leveraging  
37 host innate immunity increases the efficacy of antibiotic therapy in bacterial pneumonia.

38

## 39 INTRODUCTION

40 The discovery and development of antibiotics in the 20<sup>th</sup> century was a major turning point in medicine;  
41 it enabled the successful treatment and/or prevention of many infectious diseases in humans and in other  
42 animals. Decades later, these drugs are back in the headlines but for the wrong reasons: the alarming decline in  
43 their therapeutic effectiveness and the spread in antimicrobial resistance (AMR). The latter is a major threat to  
44 human health because it compromises our ability to treat bacterial infections and to carry out medical procedures  
45 that rely on prophylactic antibiotic use, such as chemotherapy, transplantation, and surgery (1). A single  
46 pathogen can express multiple resistance mechanisms, which in turn can often confer protection against several  
47 classes of antibiotics. In a clinical setting, this usually necessitates treatment with a “last resort” antibiotic or  
48 with combinations of antibiotics. In 2015, a report from the World Health Organization raised concerns about  
49 the lack of new antibiotics in development (2). This emphasizes the need to come up with innovative anti-  
50 infective approaches for treating resistant pathogens and preventing the further dissemination of AMR.

51 Advances in medicine and technology have provided deeper insights into immunology and thus  
52 increased the viability of host-directed therapeutic strategies. For example, the targeted stimulation of innate  
53 immunity using immunomodulatory drugs has gained much attention in recent years (3). This approach has  
54 three main advantages: (i) it makes use of universal, built-in machinery that is ready to activate in most  
55 individuals, (ii) it has both anti-infective and pro-recovery effects, and (iii) the complex innate immune system  
56 mobilizes many different effectors through a tightly coordinated string of events, and thus counters the potential  
57 development of AMR by invading pathogens. The host’s recognition of immediate danger is instrumental in  
58 mounting a successful defense against invading pathogens. *In vivo*, many cell types are equipped with pattern-  
59 recognition receptors; for example, Toll-like receptors (TLRs) are present on many cell types and are capable  
60 of binding to conserved macromolecules expressed by microorganisms (4). Thus, TLR engagement by an  
61 agonist triggers signaling cascades that lead to the transcriptional activation of immune genes and the regulation  
62 of antibacterial mechanisms for eliminating the threat. Signaling by TLRs triggers the production of various  
63 chemokines and antimicrobial compounds, activates complement, and stimulates leukocyte differentiation and  
64 mobilization. In view of the TLR-dependent response mechanisms’ early involvement in host defense, their  
65 robust activation and their highly inducible nature, researchers have sought to design novel or improved current

66 therapies against viral and bacterial infections (3, 5). Monophosphoryl lipid A (MPLA) is a derivative of the  
67 immunostimulatory lipid A component of the outer-membrane-expressed lipopolysaccharide (LPS) from the  
68 bacterium *Salmonella minnesota* R595 (6). Lipopolysaccharide itself is highly toxic, due to its ability to strongly  
69 activate TLR4 downstream signaling at low doses via both of the receptor's adaptor proteins, namely myeloid  
70 differentiation primary response 88 (MyD88) and Toll/interleukin-1 receptor domain-c activation protein  
71 inducing interferon beta (TRIF). In contrast, activation of TLR4 by MPLA is biased towards TRIF-dependent  
72 TLR4 signaling, making MPLA safe for use in humans (7). Monophosphoryl lipid A induces a significant but  
73 attenuated innate immune response (8-10); this property is related to the differences in its molecular structure  
74 vs. LPS (11, 12). The combination of immunostimulatory activity and low toxicity make MPLA an attractive  
75 candidate for therapeutic use in humans. Years of research have paved the way to MPLA becoming the first  
76 TLR agonist to be licensed as an adjuvant in certain vaccine formulations (12-14). Despite the growing body  
77 of literature data (indicating continued interest in finding further applications for MPLA), most studies have  
78 focused on its use as a prophylactic treatment. Indeed, MPLA has been shown to confer protection against  
79 infections by (i) *Pseudomonas aeruginosa* in burn-wounds, (ii) *Staphylococcus aureus* under post-hemorrhagic  
80 conditions, and (iii) nontypeable *Haemophilus influenzae* in the nasopharynx (15-18). In view of these  
81 observations, we hypothesized that MPLA may be a viable treatment against an ongoing bacterial infection,  
82 and so looked into both its applicability and efficacy as an anti-infective therapy. To the best of our knowledge,  
83 the only other previous study of this approach was performed in the context of fungal infection (19).

84         In order to tackle the challenges of developing alternative therapeutic strategies against bacterial  
85 infections and combating the spread of AMR, we designed and performed the present proof-of-concept study.  
86 The prime objective was to establish whether host immune responses can be leveraged to achieve a successful  
87 treatment outcome. Using a previously established murine model of invasive pneumococcal disease (20, 21),  
88 we determined whether deliberately TLR4-activated innate immune responses can constitute an adjunct to  
89 standard antibiotic therapy, improve the latter's efficacy, and/or promote quicker tissue recovery after an  
90 infection. To this purpose, the study investigates the MPLA effect on amoxicillin (AMX), a beta-lactam  
91 antibiotic used as first-line treatment against *S. pneumoniae*.

## 92 RESULTS

### 93 The combination of MPLA and amoxicillin increases *S. pneumoniae* clearance and extends survival

94 Intraperitoneal administration of MPLA to naïve animals (0.5 to 50 µg per mouse) increased the mRNA and  
95 protein levels of inflammatory mediators - indicating MPLA's ability to induce innate immune responses three  
96 hours post-administration (**Figure S1**). The magnitude of the systemic immune responses (i.e. in the liver and  
97 blood) was strongly dependent on the dose of MPLA. Innate immune responses were also observed in the lungs  
98 after the systemic injection of MPLA, albeit only at the highest dose (50 µg). This result suggests that the  
99 systemic administration of MPLA promotes both systemic and pulmonary immune responses - a feature that  
100 could potentially be exploited in the host-directed therapy of respiratory infectious diseases.

101 We next looked at whether MPLA's immunomodulatory effects impacted the bacterial load during  
102 pneumococcal infection in mice when the TLR4 activator was administered together with AMX, a first-line  
103 treatment against *S. pneumoniae*. Twelve hours after intranasal inoculation with *S. pneumoniae*, Swiss (CD-1)  
104 mice received either a sub-curative dose of AMX (10 µg per animal; 0.4 mg/kg, administered by oral gavage),  
105 MPLA (50 µg per animal; 2.0 mg/kg, administered by intraperitoneal injection) or a combination of the two  
106 treatments (AMX+MPLA). Bacterial counts in the lungs and spleen were determined at different time points as  
107 surrogate markers of pneumonia and bacterial dissemination, respectively (**Figure 1**). At 24 hours post-  
108 infection, the bacterial loads in the lungs and spleens were lower in all treated animals than in mock-treated  
109 animals; however, the differences between the three treatments were not statistically significant (**Figure 1B-**  
110 **D**). In contrast, we observed significant intergroup differences in the bacterial loads at 48 hours post-infection  
111 (**Figure 1B-C and 1E**). Bacterial clearance was greatest in the AMX+MPLA group, with a median CFU value  
112 of  $5.1 \times 10^2$  in the lungs, and nearly undetectable bacterial levels in the spleen; this can be compared with values  
113 of  $3.6 \times 10^7$  and  $1.9 \times 10^6$  CFU recorded in the lungs and spleen of mock-treated infected animals, respectively  
114 (corresponding to  $7.1 \times 10^4$ - and  $1.1 \times 10^5$ -fold differences in the bacterial load, respectively). The lung  
115 bacterial load was  $1.3 \times 10^5$  CFU for AMX-treated mice and  $9.4 \times 10^3$  CFU for MPLA-treated mice, i.e.  
116 respectively 255 and 18 times higher than in the AMX+MPLA group. Importantly, AMX and MPLA  
117 monotherapies were unable to prevent bacteremia; the respective median splenic bacterial loads were  $4.6 \times 10^3$   
118 and  $1.8 \times 10^2$  CFU.

119 Interestingly, the bacterial load in the spleen was a strong predictor of survival (**Figure 1F**). All mock animals  
120 succumbed to infection within 3 to 6 days, whereas AMX and MPLA monotherapies were associated with  
121 survival rates of 13.3% and 40%, respectively. The AMX+MPLA treatment outperformed the two  
122 monotherapies, with a survival rate of 86.7% - more than twice the value for MPLA, and over six times the  
123 value for AMX. It is noteworthy that the difference in the survival rate between AMX+MPLA treatment and  
124 high-dose AMX monotherapy (30 µg per animal; 1.2 mg/kg) was not significant (**Figure S2A**). This suggests  
125 that co-administration of MPLA with low-dose AMX can boost the antibiotic's efficacy to levels comparable  
126 with standalone, higher-dose treatment. A similar potentiating effect was observed in the congenic BALB/c  
127 mice (**Figure S2B**). Overall, the present results demonstrate that AMX+MPLA combination treatment  
128 improves the therapeutic outcome of low-dose AMX and is efficacious against *S. pneumoniae in vivo* by  
129 minimizing bacterial lung colonization and dissemination, and promoting long-term survival.

130

### 131 **Combination treatment with AMX+MPLA mitigates pneumonia-induced lung damage**

132 We next looked at whether or not MPLA-mediated pro-inflammatory signaling exacerbated inflammation due  
133 to *S. pneumoniae* infection. To this end, the lung tissue architecture in animals having been treated 12 hours  
134 post-infection with AMX, MPLA or AMX+MPLA was analyzed 48 hours post-infection. As a positive control,  
135 a group of animals was treated with a single, curative, high dose of AMX (350 µg per animal; 14 mg/kg). The  
136 histopathological assessment revealed that treatment with MPLA in the presence or absence of AMX did not  
137 exacerbate lung inflammation (**Figure 2**). Notably, all the AMX+MPLA-treated mice did not show any signs  
138 of the perivascular inflammatory cell infiltration observed in the other groups (including animals having  
139 receiving the curative dose of AMX). The total histopathological scores also showed that AMX+MPLA  
140 treatment had the greatest impact on preservation of the lung tissue architecture, with the lowest score of 5; the  
141 corresponding values were 5.75, 6.25, 8.75 and 12 in the high-dose AMX, MPLA, low-dose AMX and mock  
142 groups, respectively (**Figure 2F**). These findings suggest that MPLA treatment not only mitigate the effects of  
143 infection-induced tissue damage but also (when combined with AMX) promotes tissue recovery and improves  
144 the antibiotic's efficacy without exacerbating inflammation.

145

### 146 **Systemic MPLA treatment boosts the airway's innate immune responses during pneumonia**

147 It has already been shown that MPLA confers protection against bacterial challenge when administrated  
148 prophylactically, i.e. prior to the infectious challenge (15, 17, 18). Our study showed that MPLA also has an  
149 immunomodulatory effect after the infection has been established. To further characterize the local immune  
150 responses that were elicited and could participate to bacterial clearance, we used microarrays to analyze the  
151 transcriptome of lung tissue. We then investigated post-treatment changes in gene expression by initially  
152 comparing the AMX- and AMX+MPLA-treated groups 2, 4, and 8 h after treatment (i.e. 14, 16 and 20 h post-  
153 infection) (**Figure 3**). The overall response to the AMX+MPLA treatment indicated an enrichment in the  
154 granulocyte adhesion and diapedesis pathway and the leukocyte mobilization pathways (**Figure 3B**). Moreover,  
155 the difference between the AMX- and AMX+MPLA-treated groups in the number of transcripts that were  
156 expressed >2- or <0.5-fold was highest at 2 h post-treatment (n=188 transcripts) and decreased over time, with  
157 106 transcripts at 4 h and 13 transcripts at 8 h (**Figure 3C**). There were 173 upregulated transcripts at 2 h, 75  
158 at 4 h, and 12 at 8 h (**Figure 3C**). The pattern and time course of expression in lungs suggested that the MPLA-  
159 induced transcriptional effects at the infection site were immediate and transient. Some of the lung transcripts  
160 strongly expressed within a few hours of treatment were associated with neutrophil function (e.g. *Ngp*, *Itgb2l*,  
161 and *Mmp8*) or encoded proteins with known antibacterial properties (e.g. CAMP or S100A8) (**Figure 3D**).  
162 In a series of follow-up experiments *in vivo*, we confirmed the above results by using RT-qPCR assays for  
163 selected genes. We extended the transcriptional study by including groups of infected and untreated animals,  
164 infected and MPLA-treated animals, and uninfected and untreated (naïve) animals (**Figure 4**). In line with the  
165 microarray data, MPLA treatment was found to accelerate the onset of potentially antimicrobial-related *Ngp*,  
166 *Itgb2l*, *Mmp8*, *Camp*, *S100a9*, *Fkbp5*, *Ifitm6*, *Il4i1*, *Prok2*, and *Zbtb16* transcript expression in infected animals  
167 in both the MPLA-only and AMX+MPLA groups (**Figure 4B**). The effect of MPLA on transcript expression  
168 was therefore independent of AMX treatment. The lung expression of pro-inflammatory genes coding for  
169 cytokines and chemokines (such as *Ccl2*, *Ccl20*, *Il1b*, or *Il12b*) was increased by infection but was not further  
170 impacted by MPLA or AMX+MPLA treatment - indicating that the expression of these genes was primarily  
171 regulated in an infection-dependent manner (**Figure 4B**). Given that we compared AMX+MPLA-treated with  
172 AMX-treated groups in our initial screening, this might explain why we failed to detect the differential  
173 expression of *Ccl2*, *Ccl20*, *Il1b*, or *Il12b* in our microarray experiments. Lastly, by comparing infected and  
174 untreated animals, infected and MPLA-treated animals, and uninfected and MPLA-treated animals (**Figure S3**),

175 we found that the transcription of some genes was somehow dependent on both infection- and MPLA-induced  
176 signaling; this suggests the presence of a priming effect in which prior *S. pneumoniae* infection results in a more  
177 robust response following the administration of MPLA. We also found that the AMX+MPLA combination did  
178 not influence the neutrophil count in the lungs and spleen 12 h post-treatment (**Figure S4**). A similar pattern  
179 was observed for alveolar macrophages. In contrast, the lung monocyte count was higher in the AMX+MPLA  
180 group than in the mock treatment group (**Figure S4A**). Overall, these results demonstrated that while a bacterial  
181 pneumonia insult can prompt airway innate immune responses, the latter are enhanced by post-infection  
182 treatment with MPLA; this probably contributes to greater bacterial clearance in the lungs.

183

#### 184 **The systemic response to AMX+MPLA combination treatment during pneumonia**

185 Since combination treatment had significantly outperformed AMX and MPLA monotherapies by limiting  
186 bacterial dissemination, we further investigated the effects of treatment on the systemic compartment. In  
187 accordance with the gene expression patterns observed in the lungs, we found that the administration of MPLA  
188 (whether concomitant with AMX treatment or not) resulted in the sharp release of pro-inflammatory mediators  
189 (such as IL-12 p40, IL-6, and CCL2) into the blood (**Figure 5**). The serum concentrations of these cytokines  
190 peaked within the first two hours of administration, after which time they fell gradually and returned to baseline  
191 levels within six to eight hours. It is noteworthy that during the first 12 hours post-treatment, neither mock- nor  
192 AMX-treated infected animals appeared to produce this type of cytokine response - further suggesting that an  
193 MPLA-dependent immediate cytokine response is instrumental in better controlling the systemic spreading of  
194 bacteria. Although the MPLA- and AMX+MPLA-treated animals displayed similar blood levels of  
195 inflammatory mediators, the survival rate was significantly higher in AMX+MPLA group – thus highlighting  
196 the importance of the antibiotic's contribution to the therapeutic efficacy of combination treatment. Since our  
197 attempts to measure MPLA in serum were not successful, we assumed that systemic as well as lung immune  
198 responses were surrogate markers of MPLA's effect and thus a way to quantify the pharmacodynamics (PD).

199 We observed a typical pharmacokinetic (PK) profile after the oral administration of 10 µg AMX per mouse,  
200 with a rapid increase and a rapid subsequent decline in the serum concentration of AMX (**Figure 6**).  
201 Interestingly, we observed that the antibiotic's maximum serum concentration and rate of decline in the



202 AMX+MPLA treatment group were slightly but significantly different from those recorded in the AMX group.  
203 Taken as a whole, these findings suggest that MPLA and AMX's particular effects and different PK profiles in  
204 the systemic compartment may contribute to the observed efficacy of the combination treatment.

205

## 206 DISCUSSION

207 The growing incidence of AMR threatens to limit the currently available treatment options for many  
208 bacterial infections. In the present study, we described an alternative strategy for combating invasive  
209 pneumococcal disease in an experimental model. We used an immunomodulator (the TLR4 agonist MPLA) as  
210 an add-on treatment to boost the efficacy of first-line antibiotic therapy. Our findings confirmed that the  
211 outcomes of sub-curative antibiotic treatment are significantly improved (i.e. greater bacterial clearance and  
212 better tissue recovery) following targeted stimulation of the host's innate immune system.

213 It has already been shown that prophylactic administration of MPLA confers protection against  
214 bacterial infection in sepsis, pneumonia, and burn-wound models of disease (15, 17, 18, 22). In our mouse  
215 model of progressive pneumococcal pneumonia, we observed that the single-shot, systemic, post-infection  
216 administration of MPLA was associated with a significantly lower bacterial load in lung and spleen and higher  
217 survival rates. These observations demonstrated that MPLA could potentially function as a therapeutic agent.  
218 On the same lines, a recent study evidenced the therapeutic effect of MPLA-containing adjuvants in the context  
219 of systemic mycosis (19). Another study reported that administration of LPS, the highly pyrogenic and toxic  
220 TLR4 agonist with antibiotic is able to eliminate Salmonella invading the mesenteric lymph nodes, in contrast  
221 to stand-alone antibiotic treatment (23). Together with our present findings, these literature data suggest that  
222 MPLA could be repurposed as a universal antimicrobial drug whose therapeutic activity is independent of the  
223 infection route and the microbial pathogen. Despite MPLA's proven adjuvant potency, a single dose of MPLA  
224 alone had a limited therapeutic effect. We therefore hypothesized that MPLA's immunostimulatory properties  
225 could be best exploited as a non-specific and safe booster of innate immune responses (thus improving the  
226 efficacy of an otherwise suboptimal dose of antibiotic), rather than as a direct antimicrobial treatment.

227 In the present proof-of-concept study with an AMX-susceptible strain of *S. pneumoniae*, we sought to  
228 replicate clinical conditions. Firstly, we treated the mice with a low dose of AMX; this mimics the context of  
229 AMR in which a poorly administered or incorrectly dosed antibiotic treatment leads to incomplete bacterial  
230 clearance or the development of resistance. Secondly, we gave the bacteria time to establish an infection prior  
231 to treatment; this simulated both the lag between diagnosis and treatment, and the cascade of immune responses  
232 to the initial bacterial insult. The combination of AMX and MPLA in a single administration had a greater

233 therapeutic effect than each monotherapy alone. It is known that *S. pneumoniae* possesses a large number of  
234 virulence factors that facilitate colonization. These include cell wall peptidoglycan components and  
235 pneumolysin, both of which appear to elicit MyD88-dependent immune responses via TLR2- and TLR4-  
236 specific pathways, respectively (24-27). Furthermore, TLR9 has been shown to have a major role in early host  
237 defenses against *S. pneumoniae* infections (28, 29). Given that MPLA immunostimulation is biased towards  
238 TRIF-mediated signaling downstream of TLR4, it is tempting to speculate that the introduction of  
239 *S. pneumoniae* provides just the right type and right amount of primary stimulation via MyD88, which is then  
240 amplified by the introduction of the secondary stimulus (MPLA) - leading to an enhanced immune response  
241 through the activation of both MyD88- and TRIF-dependent pathways. Toll-like receptor-specific priming  
242 induced by pneumococcal pneumonia may be a major factor in the enhanced immune response observed upon  
243 MPLA treatment in our model.

244         It remains to be seen how MPLA is involved in greater bacterial clearance in the context of treatment  
245 with sub-curative doses of AMX. The MPLA-associated transcriptional signature in the lungs of infected  
246 animals highlighted the upregulation of genes associated with neutrophil function and tissue homing. One can  
247 assume that a greater neutrophil count and an enhanced killing capacity may drive MPLA's antibacterial action  
248 and synergize them with the antibiotic's effects in the airways. Our preliminary data at 12h post-treatment did  
249 not highlighted changes in neutrophil number in lung and spleen; however, monocytes were found in higher  
250 number in lung (**Figure S4**). Similarly, the systemic effects of MPLA-mediated signaling (such as the transient  
251 production of cytokines and chemokines) may link immune cell activation to bacterial clearance in the  
252 peripheral tissues. Our previous research on the TLR5 agonist flagellin identified two contributory mechanisms  
253 in bacterial clearance: (i) greater infiltration of myeloid cells into the lungs and airways, and (ii) the activation  
254 of IL-17/IL-22 responses by innate lymphoid cells (20, 21, 30, 31). Here, the lung transcriptional signature  
255 suggests that MPLA influences the myeloid cell compartment by promoting recruitment and activating  
256 antibacterial activity. In contrast to flagellin, MPLA administration was not associated with the rapid production  
257 of IL-17/IL-22 by lung innate lymphoid cells; this is also the case for LPS (31). TLR signaling is associated  
258 with broad range of antibacterial mechanisms in various cell types, some of which are probably independent of  
259 AMR mechanisms (4). A multifactorial action is also a means of developing a therapeutic approach that is less

260 likely to promote AMR. With a view to defining specific immune targets, it will be important to determine how  
261 the MPLA-stimulated immune system cooperates with an antibiotic to improve treatment efficacy.

262 Drug PK and PD studies provide a quantitative basis for dosing regimens in humans and other animals.  
263 Orally administered AMX is absorbed rapidly in humans, and has a relatively short period of serum availability  
264 (32-34). The absorption in mice is reportedly even faster (35, 36). The PK characteristics of AMX indicate that  
265 this antibiotic is efficacious very soon after administration. Hence, AMX's bactericidal activity depends greatly  
266 on the time during which the serum concentration exceeds the minimum inhibitory concentration for its target;  
267 accordingly, multiple, regular administrations are required to ensure efficacy (37, 38). Although these treatment  
268 regimens are used widely, they are always associated with the risk of encouraging the development of AMR.  
269 Amoxicillin's rapid PK maximum and minimum concentrations were in contrast with the PD characteristics of  
270 MPLA, i.e. longer-term activation of the immune system. Our present findings suggest that the different time  
271 scales of AMX's and MPLA's respective activities increased the overall efficacy of treatment when the two are  
272 administered together. On a PK level, we also observed a slight increase in AMX retention when latter was  
273 combined with MPLA. Future research must focus on whether and how the two substances interact specifically  
274 *in vivo* in an infectious context.

275 Our present results highlighted on the potential of targeting innate immunity with a TLR4 agonist as a  
276 viable strategy for improving antibiotic therapy against a bacterial infection. This pragmatic approach uses the  
277 host's immune system to strengthen the attack against invading microorganisms, and may also help to repurpose  
278 currently available drugs with known characteristics. Our experimental evidence suggests that the enhanced  
279 therapeutic effect of the MPLA-AMX combination is achieved through a combination of TLR4 priming and  
280 the time scales of MPLA's and AMX's respective peak biological activities. In the future, it will be important  
281 to investigating possible synergistic relationships between individual treatment components by using (i) PK/PD  
282 analyses and comprehensive mathematical modelling, and (ii) further *in vivo* simulations in multidrug resistant  
283 strains treated with high-dose and/or multiple-dose antibiotic regimens. Ultimately, this promising approach  
284 may open up new avenues for the design of host-directed therapeutics for infectious diseases.

285

## 286 MATERIALS AND METHODS

287 **Ethics statement.** Animals were maintained in individually ventilated cages and were handled in a vertical  
288 laminar flow cabinet (biosafety level 2). All experiments complied with current national, institutional and  
289 European regulations and ethical guidelines, were approved by our Institutional Animal Care and Use  
290 Committee (animal facility agreement C59-350009, Institut Pasteur de Lille; reference: APAFIS#5164,  
291 protocol 2015121722429127\_v4) and were conducted by qualified, accredited personnel.

292  
293 **Bacterial strains and cell cultures.** *Streptococcus pneumoniae* serotype 1 (clinical isolate E1586) was obtained  
294 from the Uruguayan Ministry of Health's National Reference Laboratory (Montevideo, Uruguay). Working  
295 stocks were prepared as described previously (20, 21). Briefly, Todd Hewitt Yeast Broth (THYB) (Sigma-  
296 Aldrich, St. Louis, MO, USA) was inoculated with fresh colonies grown in tryptic soy agar plates  
297 supplemented with 5% sheep blood (BioMérieux, Marcy-l'Étoile, France), and incubated at 37°C until the  
298 OD<sub>600nm</sub> reached 0.7-0.9 units. Cultures were stored at -80°C in THYB + glycerol 12% (vol/vol) for up to 3  
299 months. For mouse infections, working stocks were thawed and washed with sterile Dulbecco's phosphate-  
300 buffered saline (PBS; Gibco, Grand Island, NY, USA) and diluted to the appropriate concentration. The number  
301 of bacteria (expressed in colony forming units [nezs]) was confirmed by plating serial dilutions onto blood agar  
302 plates.

303  
304 **The mouse model of infection.** Six- to eight-week-old female BALB/cJrj (BALB/c), C57BL/6Jrj (C57BL/6)  
305 or RjOrl:SWISS (CD-1) mice (Janvier Laboratories, Saint Berthevin, France) were used for all *in vivo*  
306 experiments. Infection was carried out as described previously (30, 39). Briefly, mice were first anesthetized  
307 by intraperitoneal injection with a solution of 1.25 mg ketamine plus 0.25 mg xylazine in 250 µL of PBS, after  
308 which they were infected intranasally with a 30 µL PBS suspension containing 1 to 4 × 10<sup>6</sup> CFU of *S.*  
309 *pneumoniae*. All the treatments described below were administered once 12h post-infection. Mice were  
310 sacrificed at selected times via the intraperitoneal injection of 5.47 mg of sodium pentobarbital in 100 µl PBS  
311 (Euthasol, Virbac, Carros, France). Blood was sampled by retro-orbital puncture into Z-Gel micro tubes to  
312 prepare serum for downstream applications (Sarstedt, Nümbrecht, Germany). Lungs and spleens were collected,  
313 homogenized, and plated onto blood agar to determine the endpoint bacterial load. For survival assays, both

314 mortality and changes in body weight were monitored; mice were individually weighed prior to infection and  
315 then every 24h for a period of up to two weeks.

316  
317 **Reagents and administration of treatments *in vivo*.** Amoxicillin trihydrate (Sigma-Aldrich) was prepared in  
318 a stock solution of 1.75 mg/mL in sterile water and then adjusted to a final dose of 5, 30, or 350 µg/mouse (i.e.,  
319 0.2, 1.2, or 14 mg/kg) before intragastric administration of a volume of 200 µL by oral gavage.  
320 Lipopolysaccharide from *E. coli* O111:B4 (S-form) and MPLA from *S. minnesota* R595 (Re) (TLRpure™,  
321 Innaxon Therapeutics, Bristol, United Kingdom) were obtained as sterile solutions or prepared from powder  
322 with sterile distilled water to a concentration of 1 mg/L (according to the manufacturer's recommendations)  
323 and then adjusted to different final concentrations in sterile PBS and administered by intraperitoneal injection  
324 (200 µL).

325  
326 **Quantification of gene expression and microarrays.** Lungs were perfused with PBS prior to sampling. Lung  
327 or liver total RNA was extracted with the Nucleospin RNA II kit (Macherey Nagel, Düren, Germany) and  
328 reverse-transcribed with the High-Capacity cDNA Archive Kit (Applied Biosystems, Foster City, CA, USA).  
329 The cDNA was amplified using SYBR-Green-based real-time PCR on a Quantstudio™ 12K Real-Time PCR  
330 System Thermo Fisher Scientific, Carlsbad, CA, USA). Specific primers used are listed in **Table S1**. Relative  
331 mRNA levels were determined by comparing the PCR cycle thresholds (Ct) for the gene of interest vs. *Actb*  
332 ( $\Delta$ Ct) and then the  $\Delta$ Ct values for treated vs. untreated (mock) groups ( $\Delta\Delta$ Ct). For the microarray analysis, total  
333 RNA yield and quality were further assessed on the Agilent 2100 bioanalyzer (Agilent Technologies, Santa  
334 Clara, CA, USA). One-color whole mouse (084809\_D\_F\_20150624 slides) 60-mer oligonucleotide 8x60k v2  
335 microarrays (Agilent Technologies) were used to analyze gene expression. The cRNA labelling, hybridization  
336 and detection steps were carried out according to the supplier's instructions (Agilent Technologies). For each  
337 microarray, cyanine-3-labeled cRNA was synthesized from 50 ng of total RNA using the low-input QuickAmp  
338 labeling kit. RNA Spike-In was added to all tubes and used as a positive control in the labelling and  
339 amplification steps. Next, 600 ng of each purified labelled cRNA were then hybridized and washed following  
340 manufacturer's instructions. Microarrays were scanned on an Agilent G2505C scanner, and the data were  
341 extracted using Agilent Feature Extraction Software (version 10.7.3.1, Agilent Technologies). Microarray data

342 have been deposited in the Gene Expression Omnibus database (accession number: GSE118860). Statistical  
343 comparisons and filtering were performed with the Limma R package with 75-percentile normalization.  
344 Differentially expressed genes were considered to be those with an adjusted p-value below 0.05 after the false  
345 discovery rate had been checked with the Benjamini-Hochberg procedure (40). Pathways were investigated  
346 using Ingenuity Pathway Analysis software (Ingenuity Systems, Redwood City, CA, USA).

347  
348 **Histology.** Lungs were fixed by intratracheal perfusion with 4% formaldehyde prior to sampling. The left lobe  
349 and the upper right lobe were included in paraffin, and 3- to 5- $\mu$ m tissue sections were stained with hematoxylin  
350 and eosin reagent. The slides were blindly evaluated for neutrophil infiltration, perivascular infiltration, edema,  
351 and pleuritis on a 6-level scale, where 0 corresponded to the absence of lesions, and 1 to 5 corresponded to  
352 minimal, slight, moderate, marked, and severe lesions, respectively (Althisia, Troyes, France).

353  
354 **Quantification of serum cytokine levels.** Serum levels of CCL2, IL-6 and IL-12 p40 were measured using an  
355 ELISA, according to the manufacturer's instructions (R&D Systems, Minneapolis, MO, USA).

356  
357 **Determination of serum amoxicillin concentrations.** Serum AMX concentrations were assayed using  
358 previously developed and validated liquid chromatography tandem mass spectrometry (LC-MS/MS) method  
359 (41). In brief, the proteins in 10  $\mu$ L of serum were precipitated with 40  $\mu$ L of ice-cold methanol. After diluting  
360 the supernatant with water, the sample was injected into the LC system (Agilent Technologies) by using a  
361 gradient elution at a flow rate of 0.3 mL/min with acetonitrile and water with formic acid. The AMX ion product  
362 ( $m/z$  114) was quantified using electrospray ionization MS in positive ion mode over a calibration range from  
363 0.01 to 10  $\mu$ g/mL. In-study validation was performed according to the European Medicines Agency guidelines  
364 on bioanalytical method development (42)

365  
366 **Statistical analysis.** Results were expressed as the median and individual values, median [interquartile range]  
367 or mean  $\pm$  standard error of the mean (SEM), as appropriate. Groups were compared using a Mann-Whitney  
368 test (for two independent groups) or a Kruskal-Wallis one-way analysis of variance (ANOVA) with Dunn's  
369 post-test (for three or more groups). The log rank test was used for survival analyses. Statistical analyses were

370 performed using GraphPad Prism software (version 8.2, GraphPad Software Inc., San Diego, CA, USA), and

371 the threshold for statistical significance was set to  $p < 0.05$ .

372



373 **ACKNOWLEDGMENTS**

374 We thank Shéhérazade Sebda and Frédéric Leprêtre from University of Lille's genomics facility for preparing  
375 microarrays and depositing the data in the Gene Expression Omnibus database, respectively.

376

377 **FUNDING**

378 The study was funded by INSERM, Institut Pasteur de Lille, Université de Lille, and the Era-Net Joint Program  
379 Initiative on Antimicrobial Resistance (ANR-15-JAMR-0001-01 to FC, LM, CC and JCS) and by the German  
380 Federal Ministry of Education and Research (031L0097 to SF, RM, and CK).

381

382 **AUTHOR CONTRIBUTIONS**

383 FC performed all animal, RT-qPCR, ELISA, and flow cytometry experiments. SF and RM analyzed antibiotic  
384 PK data. LM provided FC with technical assistance. MF performed microarray experiments and bioinformatics  
385 analyses. CK, CC, and JCS designed the experiments. FC, JCS, and CC wrote the manuscript. JCS and CC  
386 supervised the experimental work as a whole.

387

388 **COMPETING INTERESTS**

389 The authors declare that the research was conducted in the absence of any commercial or financial relationships  
390 that could be construed as a potential conflict of interest.

391

392 **DATA AND MATERIALS AVAILABILITY**

393 Microarray data are available in the Gene Expression Omnibus database (accession number: GSE118860).  
394 The raw data supporting the conclusions of this manuscript will be made available by the authors, without undue  
395 reservation, to any qualified researcher.

396

397 **REFERENCES**

- 398 1. Petchiappan A, Chatterji D. 2017. Antibiotic Resistance: Current Perspectives. ACS Omega 2:7400-  
399 7409.
- 400 2. World Health Organization. 2015. Global action plan on antimicrobial resistance.  
401 <http://www.who.int/antimicrobial-resistance/publications/global-action-plan/en/>.
- 402 3. Hancock RE, Nijnik A, Philpott DJ. 2012. Modulating immunity as a therapy for bacterial infections.  
403 Nat Rev Microbiol 10:243-54.
- 404 4. Kawai T, Akira S. 2011. Toll-like receptors and their crosstalk with other innate receptors in infection  
405 and immunity. Immunity 34:637-50.
- 406 5. Hennessy EJ, Parker AE, O'Neill LA. 2010. Targeting Toll-like receptors: emerging therapeutics? Nat  
407 Rev Drug Discov 9:293-307.
- 408 6. Qureshi N, Takayama K, Ribic E. 1982. Purification and structural determination of nontoxic lipid A  
409 obtained from the lipopolysaccharide of Salmonella typhimurium. J Biol Chem 257:11808-15.
- 410 7. Mata-Haro V, Cekic C, Martin M, Chilton PM, Casella CR, Mitchell TC. 2007. The vaccine adjuvant  
411 monophosphoryl lipid A as a TRIF-biased agonist of TLR4. Science 316:1628-32.
- 412 8. Bohannon JK, Hernandez A, Enkhbaatar P, Adams WL, Sherwood ER. 2013. The immunobiology of  
413 toll-like receptor 4 agonists: from endotoxin tolerance to immunoadjuvants. Shock 40:451-62.
- 414 9. Hernandez A, Bohannon JK, Luan L, Fensterheim BA, Guo Y, Patil NK, McAdams C, Wang J,  
415 Sherwood ER. 2016. The role of MyD88- and TRIF-dependent signaling in monophosphoryl lipid A-induced  
416 expansion and recruitment of innate immunocytes. J Leukoc Biol 100:1311-1322.
- 417 10. Ulrich JT, Myers KR. 1995. Monophosphoryl lipid A as an adjuvant. Past experiences and new  
418 directions. Pharm Biotechnol 6:495-524.
- 419 11. Chilton PM, Embry CA, Mitchell TC. 2012. Effects of Differences in Lipid A Structure on TLR4 Pro-  
420 Inflammatory Signaling and Inflammasome Activation. Front Immunol 3:154.
- 421 12. Embry CA, Franchi L, Nunez G, Mitchell TC. 2011. Mechanism of impaired NLRP3 inflammasome  
422 priming by monophosphoryl lipid A. Sci Signal 4:ra28.
- 423 13. Didierlaurent AM, Morel S, Lockman L, Giannini SL, Bisteau M, Carlsen H, Kielland A, Vosters O,  
424 Vanderheyde N, Schiavetti F, Larocque D, Van Mechelen M, Garcon N. 2009. AS04, an aluminum salt- and

- 425 TLR4 agonist-based adjuvant system, induces a transient localized innate immune response leading to enhanced  
426 adaptive immunity. *J Immunol* 183:6186-97.
- 427 14. Garcon N, Chomez P, Van Mechelen M. 2007. GlaxoSmithKline Adjuvant Systems in vaccines:  
428 concepts, achievements and perspectives. *Expert Rev Vaccines* 6:723-39.
- 429 15. Bohannon JK, Luan L, Hernandez A, Afzal A, Guo Y, Patil NK, Fensterheim B, Sherwood ER. 2016.  
430 Role of G-CSF in monophosphoryl lipid A-mediated augmentation of neutrophil functions after burn injury. *J*  
431 *Leukoc Biol* 99:629-40.
- 432 16. Fensterheim BA, Young JD, Luan L, Kleinbard RR, Stothers CL, Patil NK, McAtee-Pereira AG, Guo  
433 Y, Trenary I, Hernandez A, Fults JB, Williams DL, Sherwood ER, Bohannon JK. 2018. The TLR4 Agonist  
434 Monophosphoryl Lipid A Drives Broad Resistance to Infection via Dynamic Reprogramming of Macrophage  
435 Metabolism. *J Immunol* 200:3777-3789.
- 436 17. Hirano T, Kodama S, Kawano T, Maeda K, Suzuki M. 2011. Monophosphoryl lipid A induced innate  
437 immune responses via TLR4 to enhance clearance of nontypeable *Haemophilus influenzae* and *Moraxella*  
438 *catarrhalis* from the nasopharynx in mice. *FEMS Immunol Med Microbiol* 63:407-17.
- 439 18. Roquilly A, Gautreau L, Segain JP, de Coppet P, Sebille V, Jacqueline C, Caillon J, Potel G, Lejus C,  
440 Josien R, Asehnoune K. 2010. CpG-ODN and MPLA prevent mortality in a murine model of post-hemorrhage-  
441 *Staphylococcus aureus* pneumonia. *PLoS One* 5:e13228.
- 442 19. Landgraf TN, Fernandes FF, Peron G, Panunto-Castelo A. 2017. Therapeutic effect of monophosphoryl  
443 lipid A administration on *Paracoccidioides brasiliensis*-infected mice. *Med Mycol* 55:344-348.
- 444 20. Munoz N, Van Maele L, Marques JM, Rial A, Sirard JC, Chabalgoity JA. 2010. Mucosal administration  
445 of flagellin protects mice from *Streptococcus pneumoniae* lung infection. *Infect Immun* 78:4226-33.
- 446 21. Van Maele L, Carnoy C, Cayet D, Ivanov S, Porte R, Deruy E, Chabalgoity JA, Renauld JC, Eberl G,  
447 Benecke AG, Trottein F, Faveeuw C, Sirard JC. 2014. Activation of Type 3 innate lymphoid cells and  
448 interleukin 22 secretion in the lungs during *Streptococcus pneumoniae* infection. *J Infect Dis* 210:493-503.
- 449 22. Romero CD, Varma TK, Hobbs JB, Reyes A, Driver B, Sherwood ER. 2011. The Toll-like receptor 4  
450 agonist monophosphoryl lipid a augments innate host resistance to systemic bacterial infection. *Infect Immun*  
451 79:3576-87.

- 452 23. Kaiser P, Regoes RR, Dolowschiak T, Wotzka SY, Lengefeld J, Slack E, Grant AJ, Ackermann M,  
453 Hardt WD. 2014. Cecum lymph node dendritic cells harbor slow-growing bacteria phenotypically tolerant to  
454 antibiotic treatment. *PLoS Biol* 12:e1001793.
- 455 24. Echchannaoui H, Frei K, Schnell C, Leib SL, Zimmerli W, Landmann R. 2002. Toll-like receptor 2-  
456 deficient mice are highly susceptible to *Streptococcus pneumoniae* meningitis because of reduced bacterial  
457 clearing and enhanced inflammation. *J Infect Dis* 186:798-806.
- 458 25. Knapp S, Wieland CW, van 't Veer C, Takeuchi O, Akira S, Florquin S, van der Poll T. 2004. Toll-like  
459 receptor 2 plays a role in the early inflammatory response to murine pneumococcal pneumonia but does not  
460 contribute to antibacterial defense. *J Immunol* 172:3132-8.
- 461 26. Malley R, Henneke P, Morse SC, Cieslewicz MJ, Lipsitch M, Thompson CM, Kurt-Jones E, Paton JC,  
462 Wessels MR, Golenbock DT. 2003. Recognition of pneumolysin by Toll-like receptor 4 confers resistance to  
463 pneumococcal infection. *Proc Natl Acad Sci U S A* 100:1966-71.
- 464 27. Srivastava A, Henneke P, Visintin A, Morse SC, Martin V, Watkins C, Paton JC, Wessels MR,  
465 Golenbock DT, Malley R. 2005. The apoptotic response to pneumolysin is Toll-like receptor 4 dependent and  
466 protects against pneumococcal disease. *Infect Immun* 73:6479-87.
- 467 28. Albiger B, Dahlberg S, Sandgren A, Wartha F, Beiter K, Katsuragi H, Akira S, Normark S, Henriques-  
468 Normark B. 2007. Toll-like receptor 9 acts at an early stage in host defence against pneumococcal infection.  
469 *Cell Microbiol* 9:633-44.
- 470 29. Lee KS, Scanga CA, Bachelder EM, Chen Q, Snapper CM. 2007. TLR2 synergizes with both TLR4  
471 and TLR9 for induction of the MyD88-dependent splenic cytokine and chemokine response to *Streptococcus*  
472 *pneumoniae*. *Cell Immunol* 245:103-10.
- 473 30. Porte R, Fougeron D, Munoz-Wolf N, Tabareau J, Georgel AF, Wallet F, Paget C, Trottein F,  
474 Chabalgoity JA, Carnoy C, Sirard JC. 2015. A Toll-Like Receptor 5 Agonist Improves the Efficacy of  
475 Antibiotics in Treatment of Primary and Influenza Virus-Associated Pneumococcal Mouse Infections.  
476 *Antimicrob Agents Chemother* 59:6064-72.
- 477 31. Van Maele L, Carnoy C, Cayet D, Songhet P, Dumoutier L, Ferrero I, Janot L, Erard F, Bertout J, Leger  
478 H, Sebbane F, Benecke A, Renauld JC, Hardt WD, Ryffel B, Sirard JC. 2010. TLR5 signaling stimulates the

- 479 innate production of IL-17 and IL-22 by CD3(neg)CD127+ immune cells in spleen and mucosa. *J Immunol*  
480 185:1177-85.
- 481 32. Dong WC, Hou ZL, Jiang XH, Jiang Y. 2013. A simple sample preparation method for measuring  
482 amoxicillin in human plasma by hollow fiber centrifugal ultrafiltration. *J Chromatogr Sci* 51:181-6.
- 483 33. Foroutan SM, Zarghi A, Shafaati A, Khoddam A, Movahed H. 2007. Simultaneous determination of  
484 amoxicillin and clavulanic acid in human plasma by isocratic reversed-phase HPLC using UV detection. *J*  
485 *Pharm Biomed Anal* 45:531-4.
- 486 34. Pei Q, Yang GP, Li ZJ, Peng XD, Fan JH, Liu ZQ. 2011. Simultaneous analysis of amoxicillin and  
487 sulbactam in human plasma by HPLC-DAD for assessment of bioequivalence. *J Chromatogr B Analyt Technol*  
488 *Biomed Life Sci* 879:2000-4.
- 489 35. Gisby J, Wightman BJ, Beale AS. 1991. Comparative efficacies of ciprofloxacin, amoxicillin,  
490 amoxicillin-clavulanic acid, and cefaclor against experimental *Streptococcus pneumoniae* respiratory infections  
491 in mice. *Antimicrob Agents Chemother* 35:831-6.
- 492 36. Azoulay-Dupuis E, Moine P, Bedos JP, Rieux V, Vallee E. 1996. Amoxicillin dose-effect relationship  
493 with *Streptococcus pneumoniae* in a mouse pneumonia model and roles of in vitro penicillin susceptibilities,  
494 autolysis, and tolerance properties of the strains. *Antimicrob Agents Chemother* 40:941-6.
- 495 37. Akhavan BJ, Vijhani P. 2018. Amoxicillin, StatPearls, Treasure Island (FL).
- 496 38. Wright AJ. 1999. The penicillins. *Mayo Clin Proc* 74:290-307.
- 497 39. Matarazzo L, Casilag F, Porte R, Wallet F, Cayet D, Faveeuw C, Carnoy C, Sirard JC. 2019.  
498 Therapeutic Synergy Between Antibiotics and Pulmonary Toll-Like Receptor 5 Stimulation in Antibiotic-  
499 Sensitive or -Resistant Pneumonia. *Front Immunol* 10:723.
- 500 40. Benjamini Y, Hochberg Y. 1995. Controlling the False Discovery Rate: A Practical and Powerful  
501 Approach to Multiple Testing. *Journal of the Royal Statistical Society Series B (Methodological)* 57:289-300.
- 502 41. Franck S, Fuhrmann-Selter T, Joseph JF, Michelet R, Casilag F, Sirard JC, Wicha SG, Kloft C. 2019.  
503 A rapid, simple and sensitive liquid chromatography tandem mass spectrometry assay to determine amoxicillin  
504 concentrations in biological matrix of little volume. *Talanta* 201:253-258.
- 505 42. European Medicines Agency. 2011. [https://www.ema.europa.eu/documents/scientific-](https://www.ema.europa.eu/documents/scientific-guideline/guideline-bioanalytical-method-validation_en.pdf)  
506 [guideline/guideline-bioanalytical-method-validation\\_en.pdf](https://www.ema.europa.eu/documents/scientific-guideline/guideline-bioanalytical-method-validation_en.pdf).

507 **FIGURE LEGENDS**

508 **Figure 1. Combination treatment with AMX and MPLA is effective against *S. pneumoniae* in vivo.** (A)  
509 CD-1 mice were infected intranasally with  $1 \times 10^6$  *S. pneumoniae* and then given either 10  $\mu$ g of AMX  
510 intragastrically, 50  $\mu$ g MPLA intraperitoneally, a combination of the two treatments (AMX+MPLA), or water  
511 and saline mock treatments 12 hours post-infection. Lungs and spleens were collected at different time points  
512 for quantification of the bacterial load using standard plate counting methods. (B-C) Bacterial growth over time  
513 in infected mice, showing the total bacterial load in the indicated tissues (as CFUs). Symbols represent the  
514 median value ( $n \geq 6$ /group) and error bars represent the interquartile range; the gray shaded area along the x-axis  
515 indicates the assay's limit of detection. (D-E) Lung and spleen bacterial counts from individual mice  
516 ( $n \geq 12$ /group) 24 h (D) and 48 h (E) post-infection. The solid lines indicate the median value for each group,  
517 and the gray shaded area along the x-axis indicates the assay's limit of detection. A one-way ANOVA (the  
518 Kruskal-Wallis test with Dunn's post-test for multiple comparisons) was applied. \*= $p < 0.05$ , \*\*= $p < 0.01$ ,  
519 \*\*\*= $p < 0.001$  vs. the indicated comparator groups. Data from the mock control group (shown in white) were  
520 excluded from statistical analyses of treatment groups. (F) Survival curves ( $n = 15$  mice per group). Gehan-  
521 Breslow-Wilcoxon test. \*\*\* =  $p < 0.001$  vs. infected mock treated control, # =  $p < 0.05$ , # # =  $p < 0.01$ , # # # =  
522  $p < 0.001$  vs. the indicated comparator groups.

523

524 **Figure 2. Combination treatment with AMX and MPLA mitigates infection-induced tissue damage.** CD-  
525 1 mice ( $n = 4$ /group) were infected intranasally with  $1 \times 10^6$  *S. pneumoniae*, and then given treatments 12 hours  
526 later as indicated: (A) No treatment, i.e. mock, (B) intragastric treatment with 10  $\mu$ g of amoxicillin (AMX<sub>10</sub>) or  
527 (C) 350  $\mu$ g amoxicillin (AMX<sub>350</sub>), (D) intraperitoneal treatment with 50  $\mu$ g of MPLA (MPLA), or (E) a  
528 combination of intragastric treatment with 10  $\mu$ g AMX and intraperitoneal treatment with 50  $\mu$ g of MPLA  
529 (AMX+MPLA). Hematoxylin- and eosin-stained tissue sections showing the lung architecture 48 hours post-  
530 infection (A-E). The images are representative of four biological replicates per group. Scale bar = 150  $\mu$ m. (F)  
531 Histopathological scores were assessed on a 0-5 scale: 0=absence, 1=minimal, 2=slight, 3=moderate,

532 4=marked, and 5=severe. The bars represent the mean  $\pm$  SEM. A one-way ANOVA (the Kruskal-Wallis test  
533 with Dunn's post-test for multiple comparisons) was applied. \*= $p < 0.05$  and \*\*= $p < 0.01$ .

534

535 **Figure 3. Characterization of local immune response signatures of MPLA treatment.** (A) BALB/c mice  
536 (n=3/group) were infected with  $1 \times 10^6$  *S. pneumoniae* and then treated with either 10  $\mu$ g of intragastrically  
537 administered AMX or a combination of AMX and 50  $\mu$ g of intraperitoneally administered MPLA  
538 (AMX+MPLA). Total RNA was extracted from lungs collected at different time points, and mRNA transcripts  
539 were compared in a microarray analysis. (B) Enrichment of canonical pathways, according to an Ingenuity  
540 Pathway Analysis of the microarray datasets. (C) The number of transcripts with significantly greater  
541 expression (upregulation,  $\text{Log}_2(\text{fold change [FC]} > 1)$ ) or significantly lower expression (downregulation,  
542  $\text{Log}_2\text{FC} < -1$ ) in (AMX+MPLA)-treated vs. AMX-treated animals. (D) The 25 genes with the highest or lowest  
543 differential expression levels in the microarray analysis (AMX+MPLA vs. AMX);

544

545 **Figure 4. MPLA treatment can accelerate infection-dependent immune responses at the infection site.**  
546 (A) BALB/c mice (n=3-8/group) were infected with *S. pneumoniae* and treated 12 hours post-infection with  
547 either 10  $\mu$ g of AMX intragastrically, 50  $\mu$ g MPLA intraperitoneally, a combination of the two treatments  
548 (AMX+MPLA), or left untreated; total RNA was extracted from lungs collected at different time points, and  
549 mRNA transcripts were compared using RT-qPCR assays. Expression levels were normalized against  
550 uninfected, untreated (naïve) controls. (B) Change in relative mRNA expression levels over time for selected  
551 genes under different treatment conditions. The mean  $\pm$  SEM values are shown. A two-way ANOVA with  
552 Bonferroni's post-test for multiple comparisons was applied. \*= $p < 0.05$ , \*\*= $p < 0.01$  and \*\*\*= $p < 0.001$  vs. the  
553 mock control group; += $p < 0.05$ , ++= $p < 0.01$ , and +++= $p < 0.001$  vs. the indicated comparator groups.

554

555 **Figure 5. MPLA treatment induces an immediate, transient cytokine response.** CD-1 mice (n=4/group)  
556 were infected intranasally with  $1 \times 10^6$  *S. pneumoniae* and then treated 12 hours later with either AMX (10  $\mu$ g,

557 intragastric administration), MPLA (50 µg intraperitoneal administration), a combination of AMX and MPLA,  
558 or left untreated. Blood samples were collected at different time points post-treatment. Serum levels of pro-  
559 inflammatory mediators were determined using ELISAs. (A) IL-12 p40 subunit, (B) IL-6, and (C) CCL2. The  
560 mean ± SEM values are shown. A two-way ANOVA with Bonferroni's post-test for multiple comparisons was  
561 applied. At indicated time points: \*=p<0.05, \*\*=p<0.01 and \*\*\*=p<0.001 vs. the untreated group; +=p<0.01  
562 vs. the indicated comparator groups.

563

564 **Figure 6. Pharmacokinetics of orally administered AMX in mice.** (A) CD-1 mice (n=4/group) infected with  
565  $1 \times 10^6$  *S. pneumoniae* and treated with either 10 µg intragastrically administered of amoxicillin (AMX) or a  
566 combination of AMX and a 50 µg intraperitoneally administered MPLA (AMX+MPLA). Blood samples were  
567 collected at different time points post-treatment. (B) Change in the serum AMX concentration over time, as  
568 determined using LC-MS/MS. A two-way ANOVA with Bonferroni's post-test for multiple comparisons was  
569 applied. The values shown are geometric means + range; \*=p<0.05 vs. the indicated comparator groups at  
570 indicated time points. The dashed and dotted lines along the x-axis indicate the lower limit of quantification  
571 (0.01 µg/mL) and the limit of detection (0.003 µg/mL), respectively.



**A**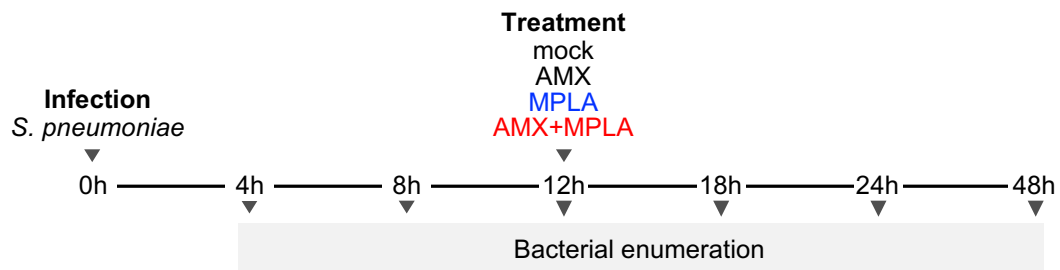**B**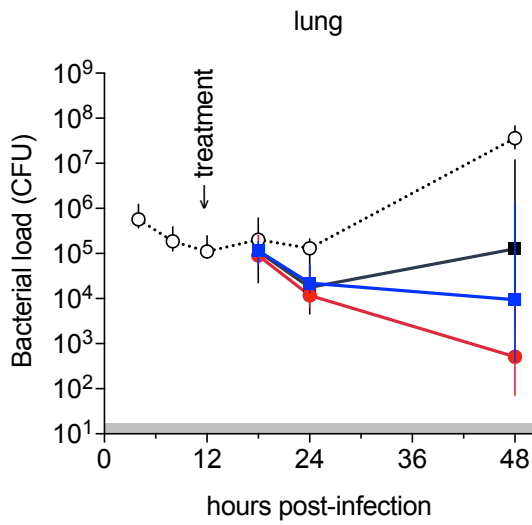**C**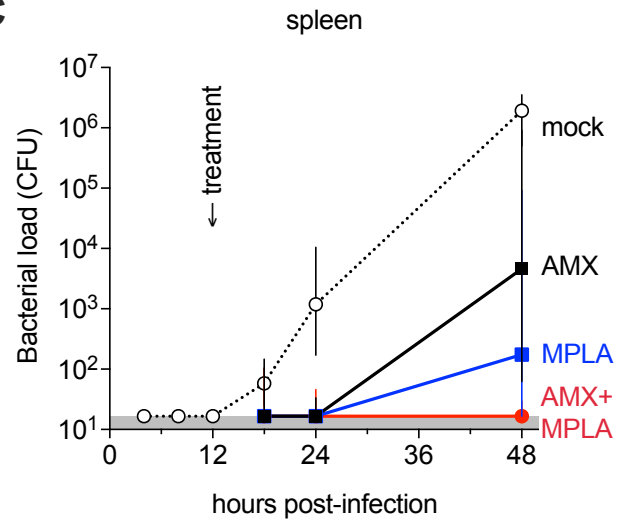**D**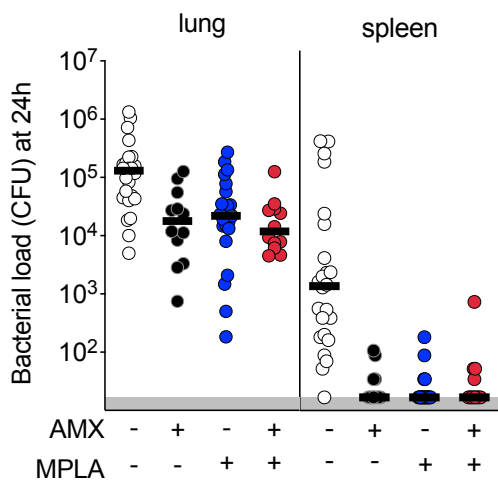**E**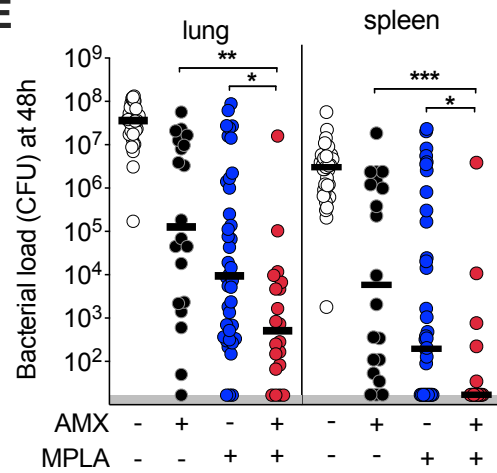**F**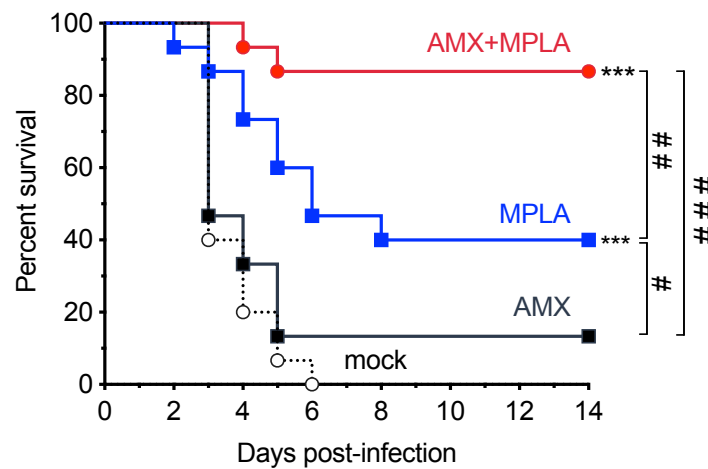

Figure 1

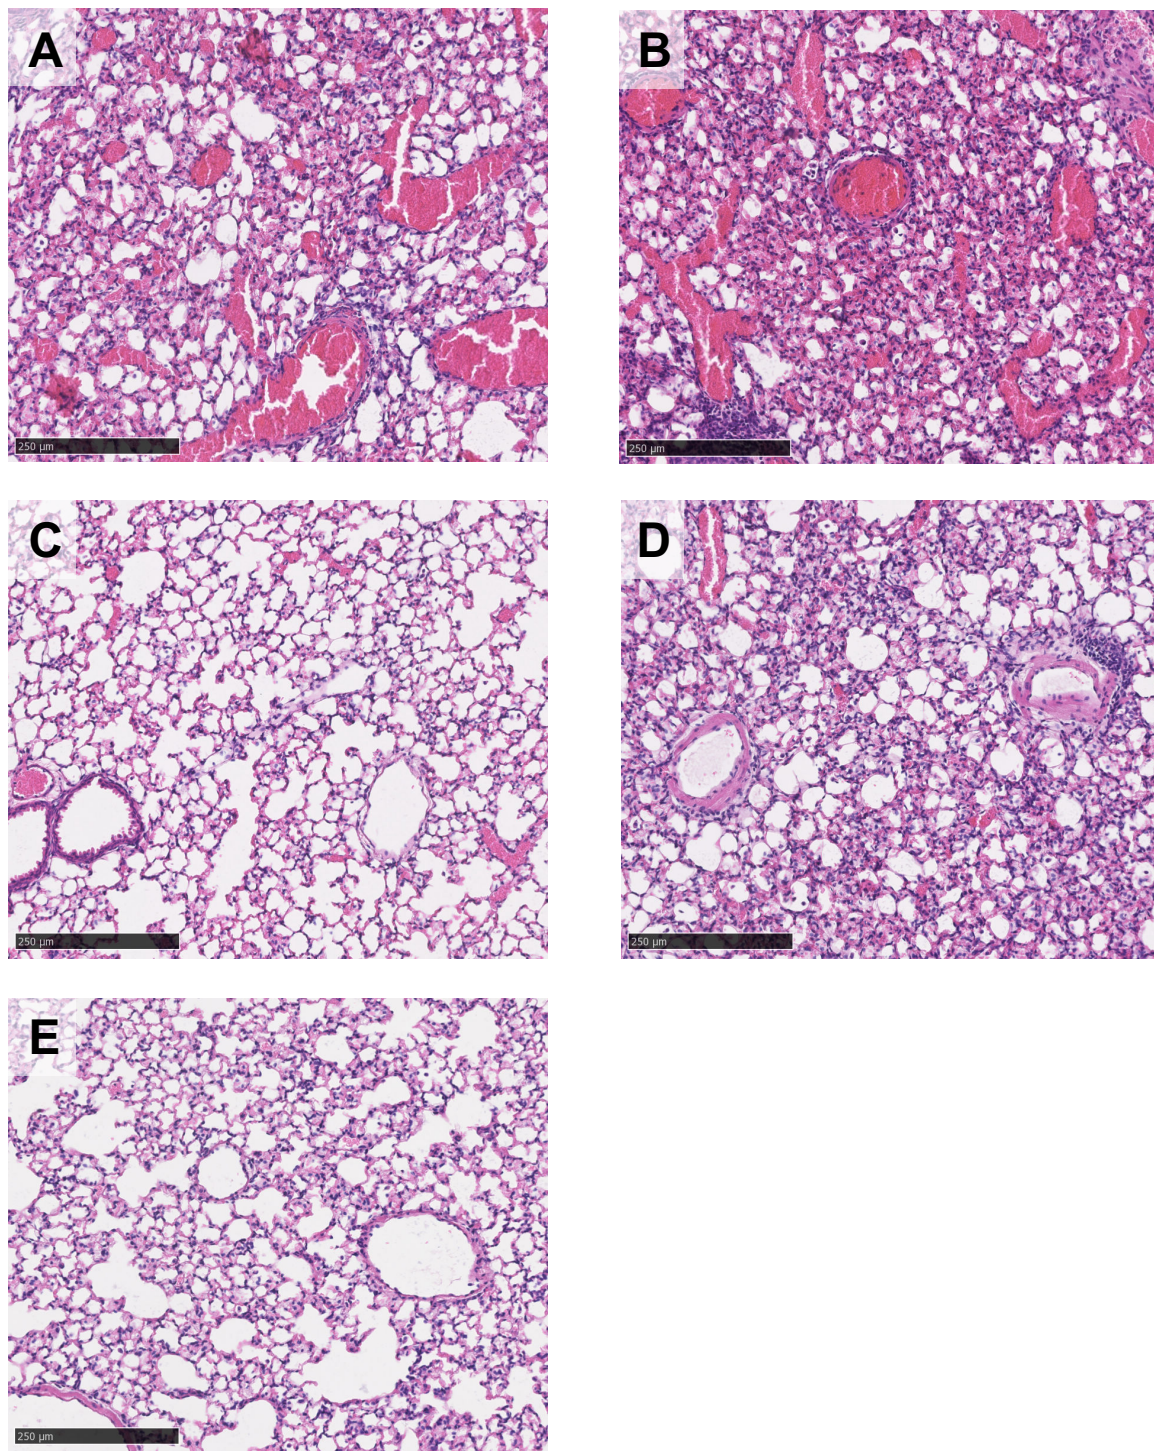

**F**

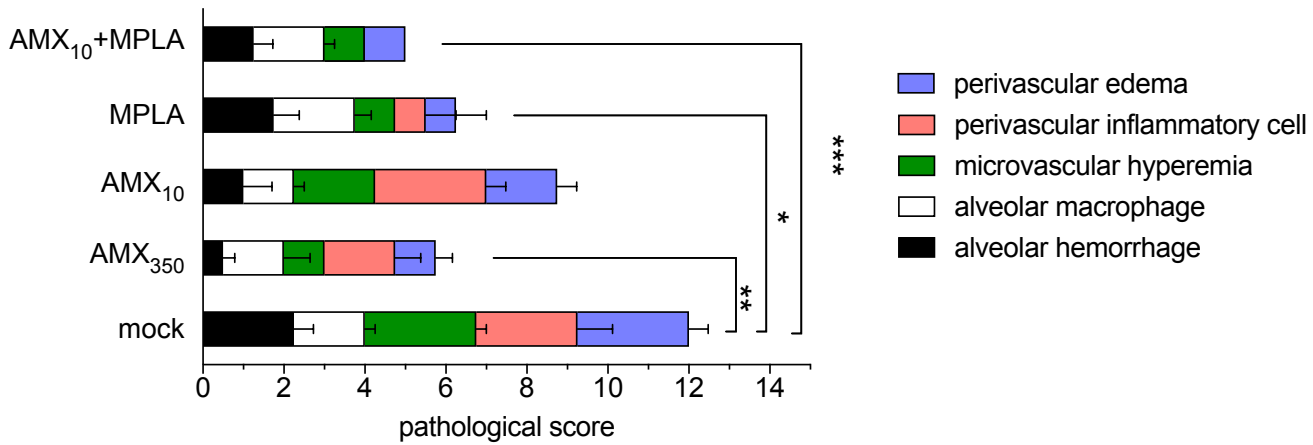

Figure 2

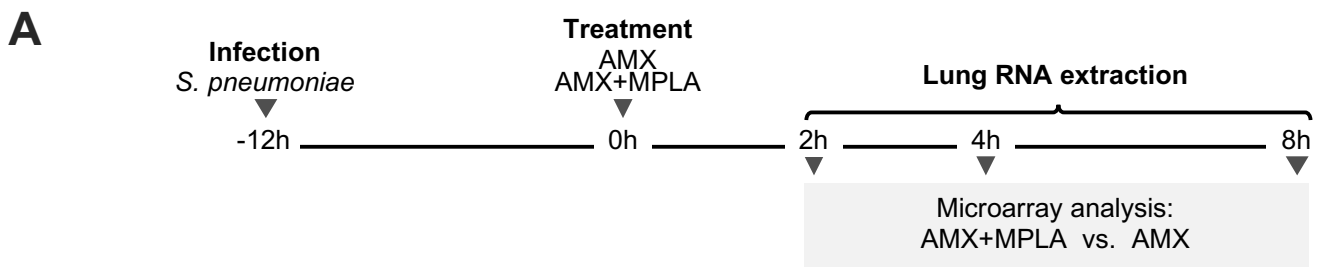

**B**

| Time (hours post-treatment) | Canonical Pathways                    | $-\log_{10}(\text{p value})$ | Molecules                                         |
|-----------------------------|---------------------------------------|------------------------------|---------------------------------------------------|
| 2                           | Granulocyte Adhesion and Diapedesis   | 5.33                         | C5AR1, FPR1, FPR2, IL1R2, MMP25, MMP8, MMP9, SELL |
|                             | Inhibition of Matrix Metalloproteases | 2.76                         | MMP8, MMP9, MMP25                                 |
|                             | Leukocyte Extravasation Signalling    | 1.45                         | MMP8, MMP9, MMP25, RAPGEF4                        |
| 4                           | Inhibition of Matrix Metalloproteases | 3.43                         | MMP8, MMP25, TIMP4                                |
|                             | Granulocyte Adhesion and Diapedesis   | 2.55                         | CXCL6, IL1R2, MMP8, MMP25                         |
|                             | Leukocyte Extravasation Signalling    | 2.22                         | MMP8, , MMP25, RAPGEF4, TIMP4                     |
| 8                           | Inhibition of Matrix Metalloproteases | 3.65                         | MMP8, MMP25                                       |
|                             | Granulocyte Adhesion and Diapedesis   | 2.42                         | MMP8, MMP9                                        |
|                             | Leukocyte Extravasation Signalling    | 2.23                         | MMP8, MMP9                                        |

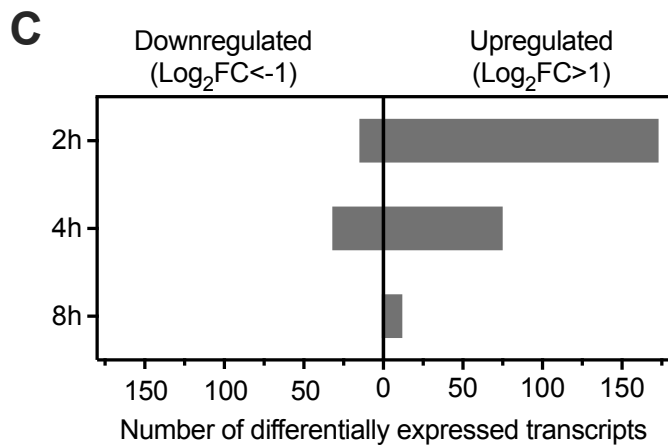

**D**

|                 | 2h     | 4h     | 8h     | $\text{Log}_2(\text{FC})$ |
|-----------------|--------|--------|--------|---------------------------|
| <i>Ngp</i>      | 4.919  | 3.497  | 2.778  |                           |
| <i>Mmp8</i>     | 4.188  | 3.292  | 2.104  |                           |
| <i>Ifitm6</i>   | 3.590  | 2.308  | 2.269  |                           |
| <i>Prok2</i>    | 3.423  | 3.983  | 4.505  |                           |
| <i>Stfa3</i>    | 3.876  | 2.191  | 1.798  |                           |
| <i>Fkbp5</i>    | 3.552  | 2.994  | 1.294  |                           |
| <i>Zbtb16</i>   | 1.252  | 4.291  | 0.519  |                           |
| <i>Doc2b</i>    | 2.236  | 4.238  | 1.224  |                           |
| <i>Itgb2l</i>   | 4.113  | 1.891  | 1.343  |                           |
| <i>Il4i1</i>    | 3.854  | 1.796  | 1.555  |                           |
| <i>Retnlg</i>   | 3.444  | 2.019  | 0.911  |                           |
| <i>Stfa1</i>    | 3.245  | 1.508  | 1.421  |                           |
| <i>Chil5</i>    | 2.612  | 1.447  | 0.878  |                           |
| <i>Scrg1</i>    | 2.837  | 1.798  | 1.181  |                           |
| <i>Camp</i>     | 2.766  | 1.409  | 0.147  |                           |
| <i>F13a1</i>    | 2.871  | 1.124  | 0.605  |                           |
| <i>Hif3a</i>    | 2.362  | 2.561  | 0.702  |                           |
| <i>S100a8</i>   | 1.956  | 1.265  | 1.430  |                           |
| <i>Mettl21e</i> | 2.043  | 2.071  | 0.769  |                           |
| <i>Ambp</i>     | 2.220  | 2.198  | 0.859  |                           |
| <i>Il1r2</i>    | 1.663  | 1.583  | 0.520  |                           |
| <i>Areg</i>     | -0.631 | -1.219 | -0.996 |                           |
| <i>Cxcl5</i>    | -0.827 | -1.753 | -0.277 |                           |
| <i>Ackr4</i>    | -0.802 | -1.868 | -0.484 |                           |
| <i>Cemip</i>    | -0.263 | -2.259 | -0.147 |                           |

Figure 3

**A**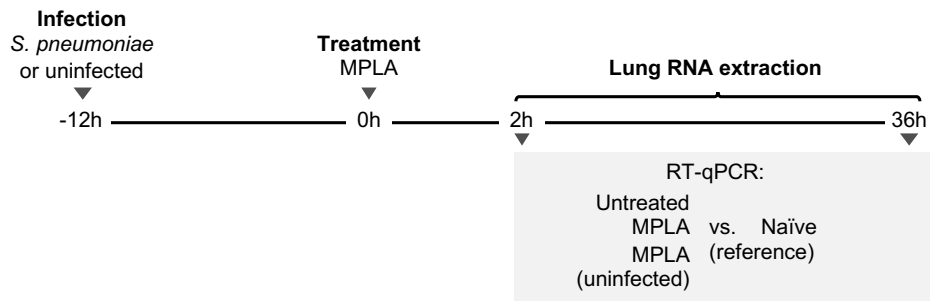**B**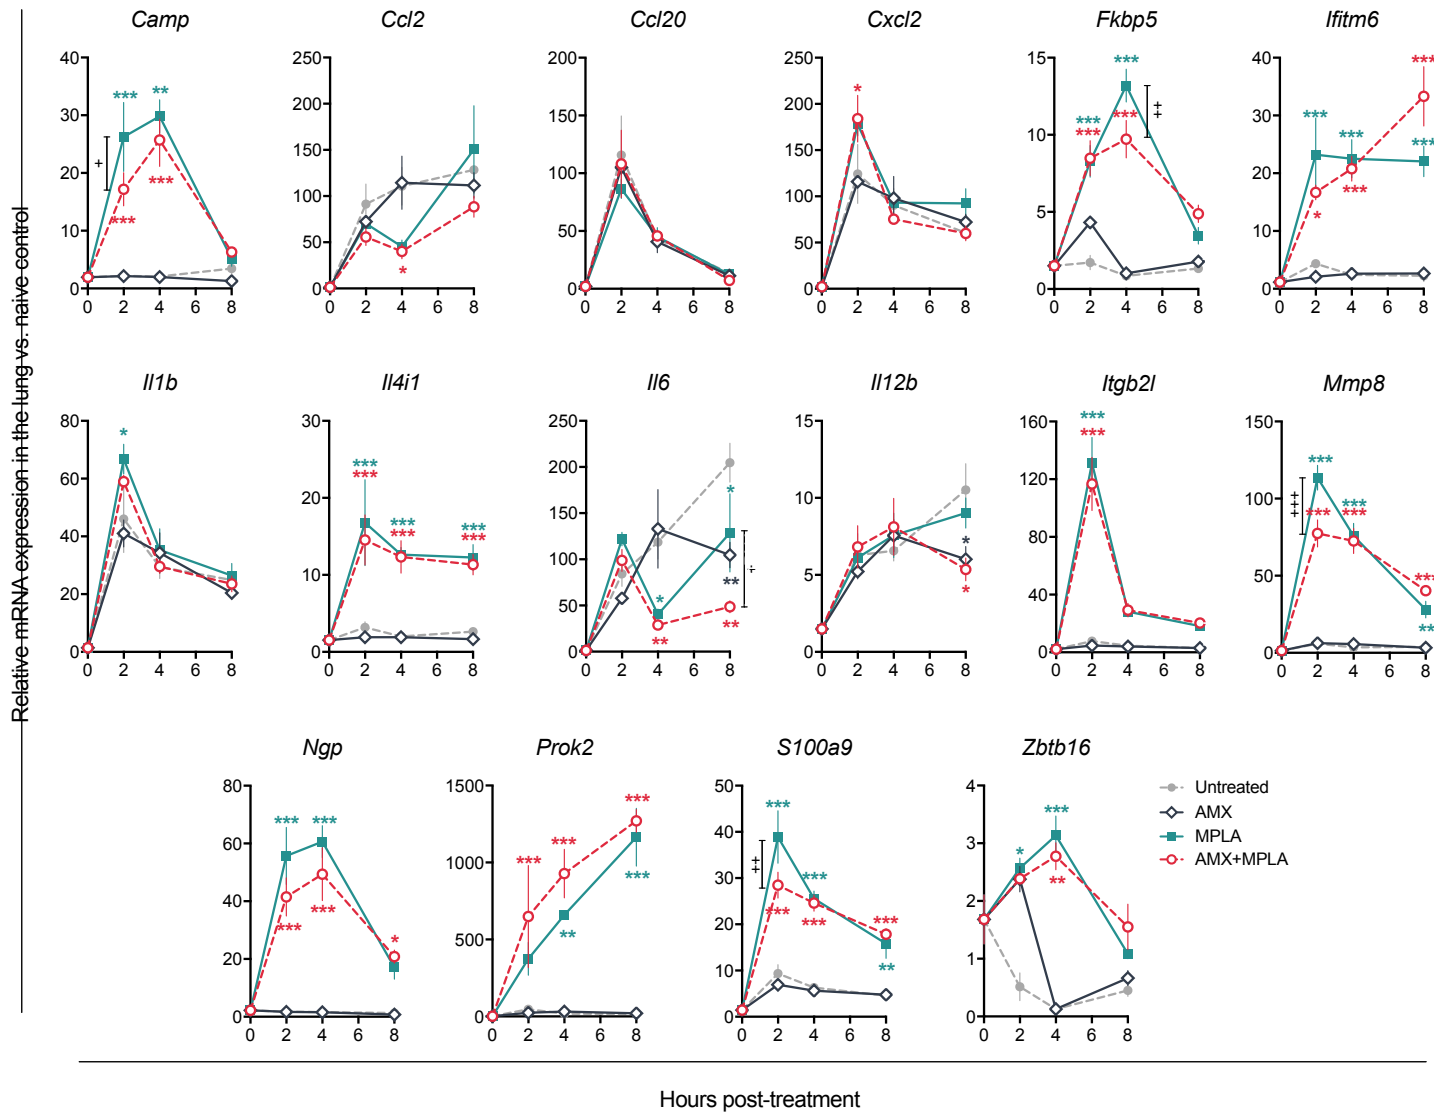

Figure 4

**A**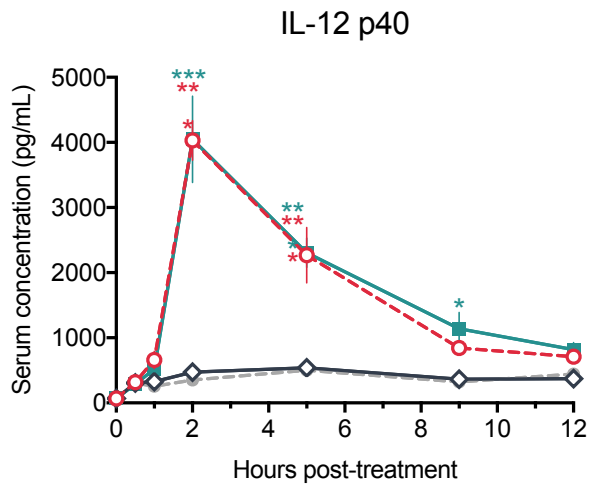**B**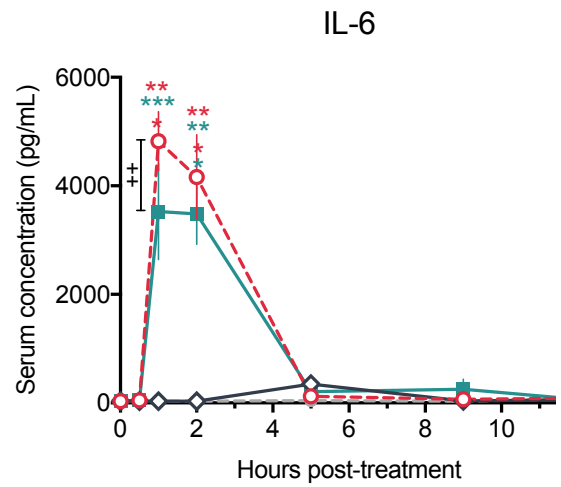**C**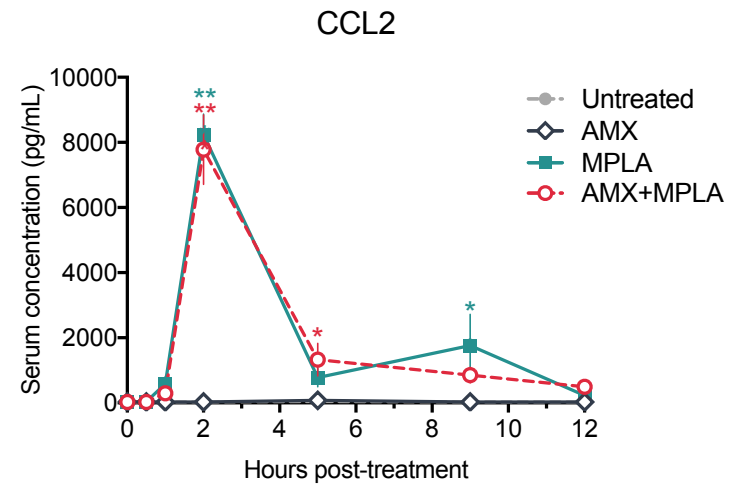

Figure 5

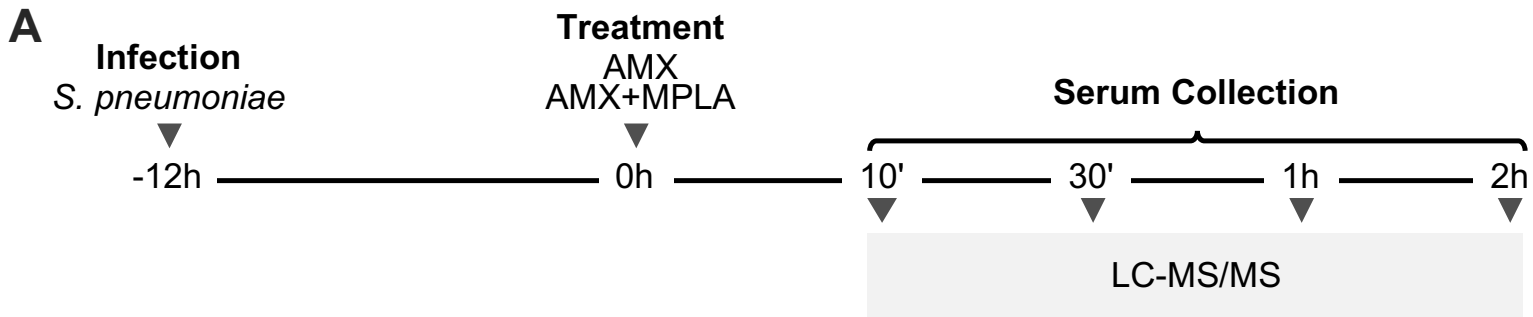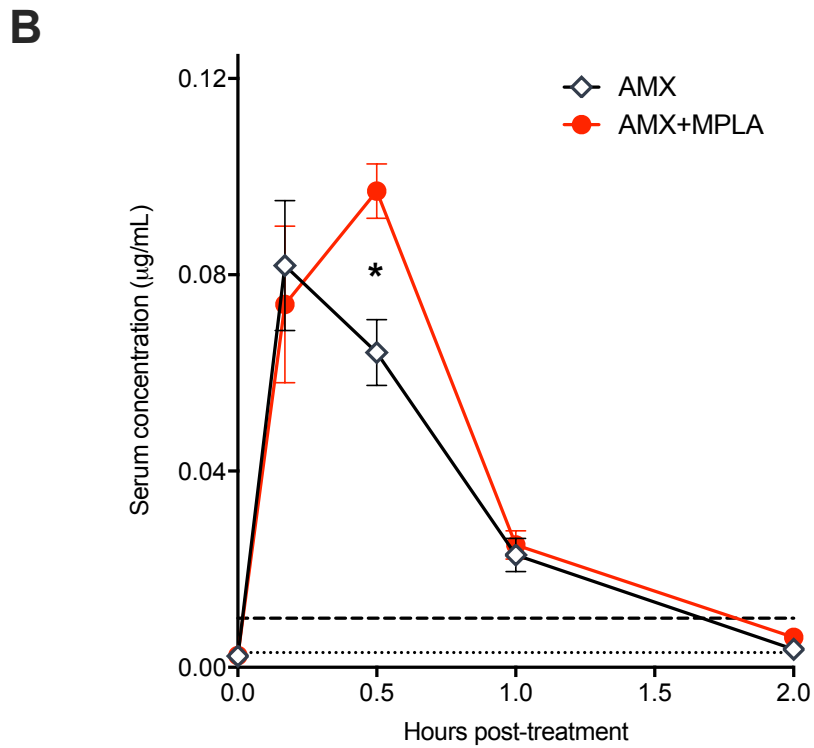

Figure 6
